# Supplementary material for: Repeated ice streaming on the northwest Greenland continental shelf since the onset of the Middle Pleistocene Transition
Source: Copernicus journal article supplement (doi:10.5194/tc-14-2303-2020), 2020-07-22
Supplement: Supplementary file 1 [file tc-14-2303-2020-supplement.pdf]

Supplement of The Cryosphere, 14, 2303–2312, 2020  
<https://doi.org/10.5194/tc-14-2303-2020-supplement>  
© Author(s) 2020. This work is distributed under  
the Creative Commons Attribution 4.0 License.

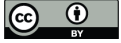

*Supplement of*

## **Repeated ice streaming on the northwest Greenland continental shelf since the onset of the Middle Pleistocene Transition**

**Andrew M. W. Newton et al.**

*Correspondence to:* Andrew M. W. Newton ([amwnewton@gmail.com](mailto:amwnewton@gmail.com))

The copyright of individual parts of the supplement might differ from the CC BY 4.0 License.

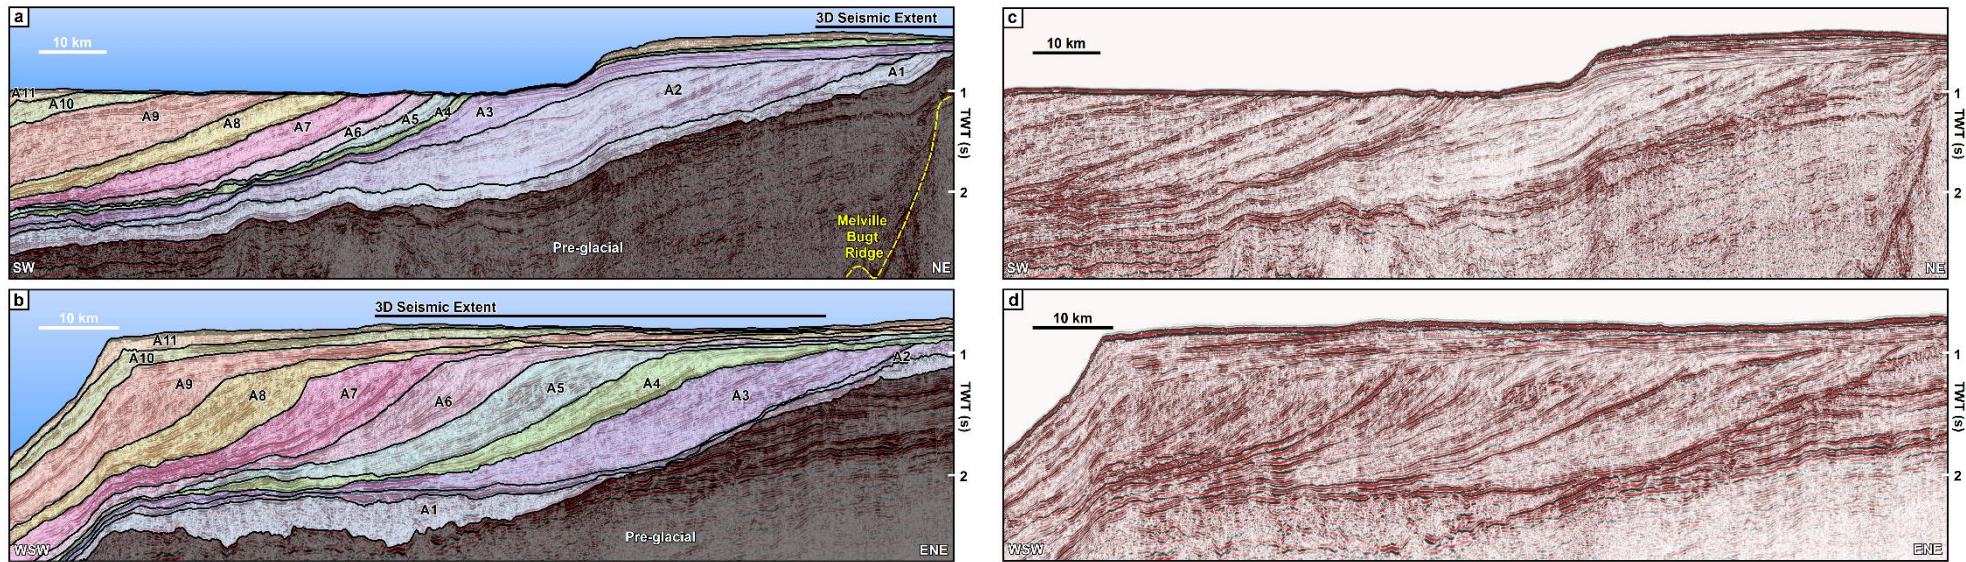

**Supplementary Figure S1:** Interpreted (a and b) and uninterpreted (c and d) seismic profiles through the units that comprise the glacial succession. These profiles are presented in Figure 2 in the main text of the paper. TWT is two-way-travel time.

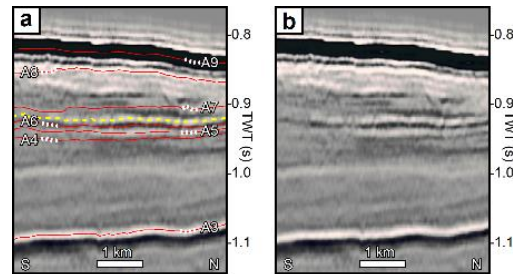

**Supplementary Figure S2:** Interpreted (a) and uninterpreted (c) seismic profiles showing the stratigraphic position of the oldest example of mega-scale glacial lineations. These profiles are presented in Figure 3 in the main text of the paper. TWT is two-way-travel time.

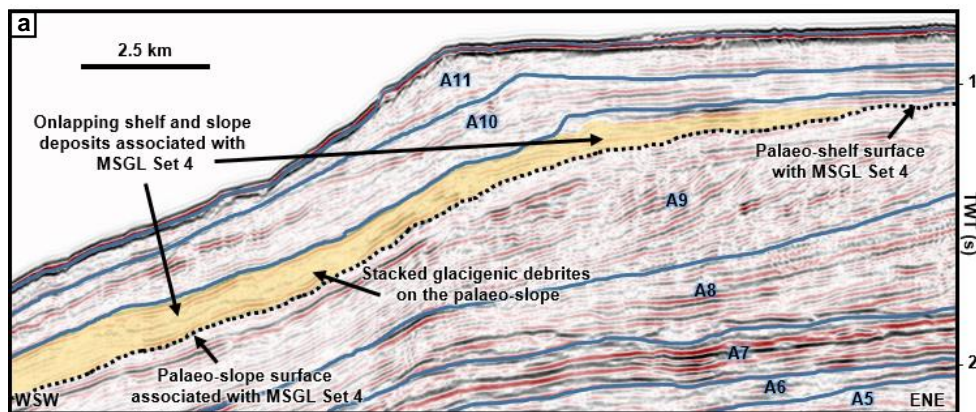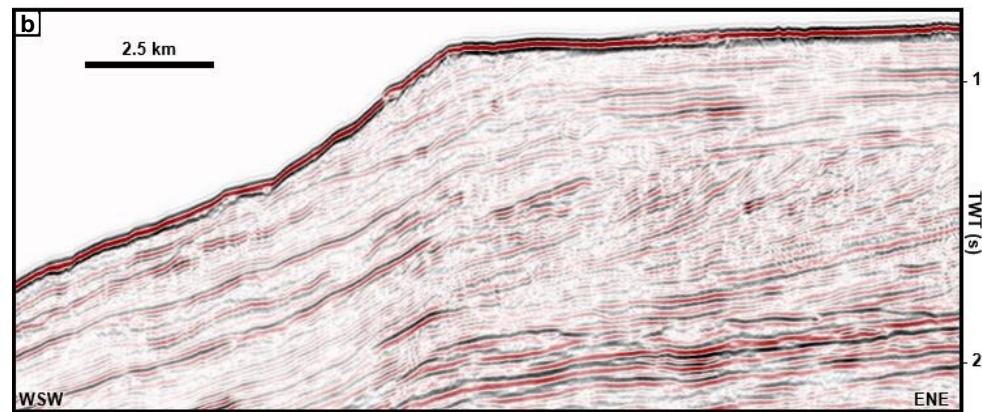

**Supplementary Figure S3:** Interpreted (a) and uninterpreted (b) seismic profiles showing stacked debrite packages. This profile is presented in Figure 5 in the main text of the paper. TWT is two-way-travel time.



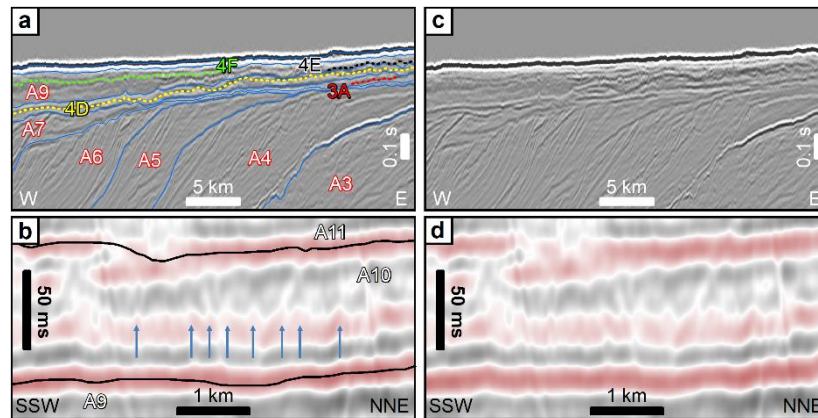

**Supplementary Figure S4:** Interpreted (a and b) and uninterpreted (c and d) seismic profiles showing stratigraphic locations of MSGL surfaces from the 3D and 2D data. These profiles are presented in Figure 6 in the main text of the paper. TWT is two-way-travel time.

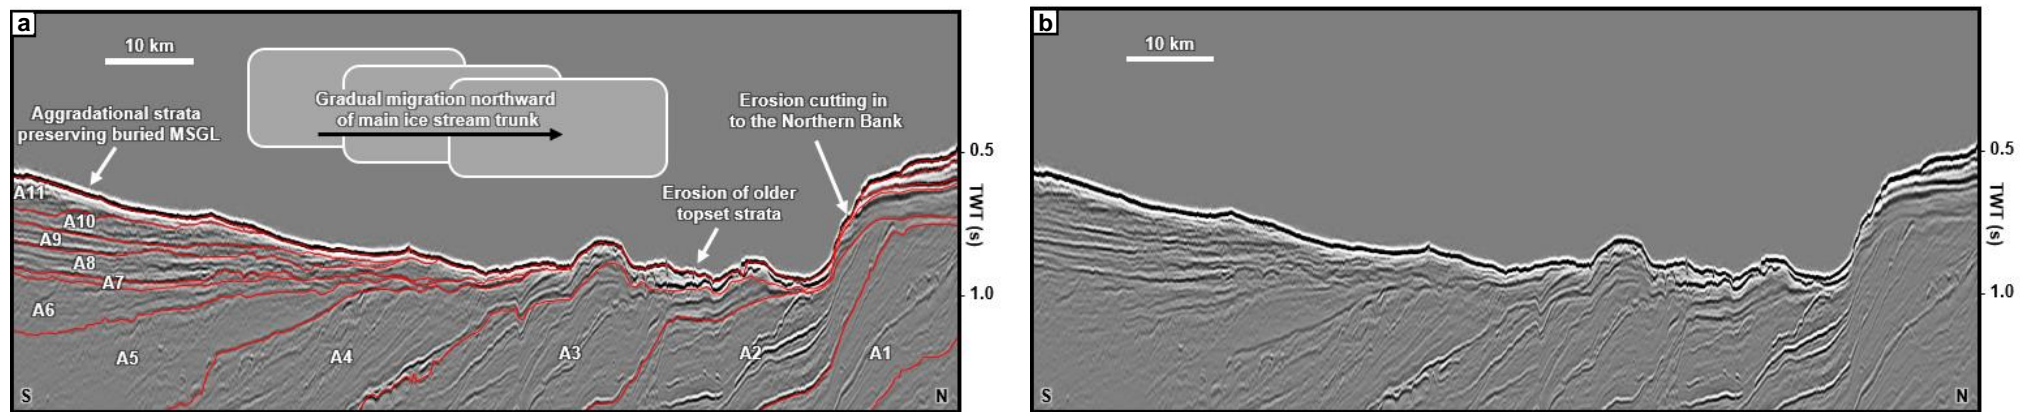

**Supplementary Figure S5:** Interpreted (a) and uninterpreted (b) seismic profiles showing variable preservation of topset deposits. This profile is presented in Figure 7 in the main text of the paper. TWT is two-way-travel time.
